# Supplementary material for: N-Functionalized MXenes: ultrahigh carrier mobility and multifunctional properties
Source: Royal Society of Chemistry journal article supplement (doi:10.1039/c7cp05816k), 2017-01-01
Supplement: c7cp05816k1.pdf [file c7cp05816k1.pdf]

Supporting Information:

## N-functionalized MXenes: Ultrahigh carrier mobility and multifunctional properties

Yangfan Shao<sup>1,2</sup>, Fang Zhang<sup>2</sup>, Xingqiang Shi<sup>2,\*</sup>, and Hui Pan<sup>1,\*</sup>

<sup>1</sup> *Institute of Applied Physics and Materials Engineering, University of Macau, Macau SAR, China*

<sup>2</sup> *Department of Physics, Southern University of Science and Technology, Shenzhen 518055, China*

\*E-mail: huipan@umac.mo (H.P.); shixq@sustc.edu.cn (X.S.);

Tel: (853)88224427; Fax: (853)88222426

Table S1. Calculated formation energies of 2D  $M_2CN_2$  and  $M_2CH_2$  ( $M = Nb$  and  $Ta$ ).

| System     | $E_f$ |
|------------|-------|
| $Nb_2CN_2$ | -3.48 |
| $Ta_2CN_2$ | -4.18 |
| $Nb_2CH_2$ | -2.12 |
| $Ta_2CH_2$ | -1.92 |

Table S2. Calculated effective mass ( $m^*$ ), deformation potential constant ( $E$ ), 2D elastic modulus ( $C$ ), and carrier mobility ( $\mu$ ) of  $Nb_2CN_2$  at  $\varepsilon = 4\%$  and  $Ta_2CN_2$  at  $\varepsilon =$

5%.

|                                 |    | $m_z^*/m_0$  | $m_a^*/m_0$  | $E_z$ | $E_a$ | $C_{z\_2D}$      | $C_{a\_2D}$ | $\mu_{z\_2D}$                               | $\mu_{a\_2D}$ |
|---------------------------------|----|--------------|--------------|-------|-------|------------------|-------------|---------------------------------------------|---------------|
|                                 |    | $\Gamma'$ -Z | $\Gamma'$ -X | eV    |       | $\text{Jm}^{-2}$ |             | $10^5\text{cm}^2\text{V}^{-1}\text{s}^{-1}$ |               |
| Nb <sub>2</sub> CN <sub>2</sub> | e  | 0.047        | 0.086        | 2.76  | 5.62  | 1357             | 1660        | 11.93                                       | 1.92          |
|                                 | 4% | h            | 0.1          | 0.045 | 2.95  |                  |             | 0.66                                        | 4.6           |
| Ta <sub>2</sub> CN <sub>2</sub> | e  | 0.1          | 0.1          | 0.65  | 2.22  | 1743             | 2071        | 82.5                                        | 8.4           |
|                                 | 5% | h            | 0.12         | 0.08  | 1.61  |                  |             | 1.68                                        | 11.21         |

Note: Carrier types ‘e’ and ‘h’ denote ‘electron’ and ‘hole’, respectively. The  $m_z^*$  and  $m_a^*$  are carrier effective masses along zigzag and armchair directions, respectively.  $m_0$  is the free electron mass.  $E_z$  ( $E_a$ ) and  $C_{z\_2D}$  ( $C_{a\_2D}$ ) are the deformation potential and 2D elastic modulus along the zigzag (armchair) directions, respectively. Mobility is calculated with the temperature T at 300 K. The vacuum level was set to zero for reference.

Table S3. Calculated effective mass ( $m^*$ ) of Nb<sub>2</sub>CN<sub>2</sub> and Ta<sub>2</sub>CN<sub>2</sub>

|     | Nb <sub>2</sub> CN <sub>2</sub> ( $\Gamma$ -M) |                  | Ta <sub>2</sub> CN <sub>2</sub> ( $\Gamma$ -M) |                  |
|-----|------------------------------------------------|------------------|------------------------------------------------|------------------|
|     | $m^*/m_0$<br>(electron)                        | $m^*/m_0$ (hole) | $m^*/m_0$<br>(electron)                        | $m^*/m_0$ (hole) |
| PBE | 0.12                                           | 0.10             | 0.09                                           | 0.09             |
| HSE | 0.13                                           | 0.10             | 0.10                                           | 0.10             |

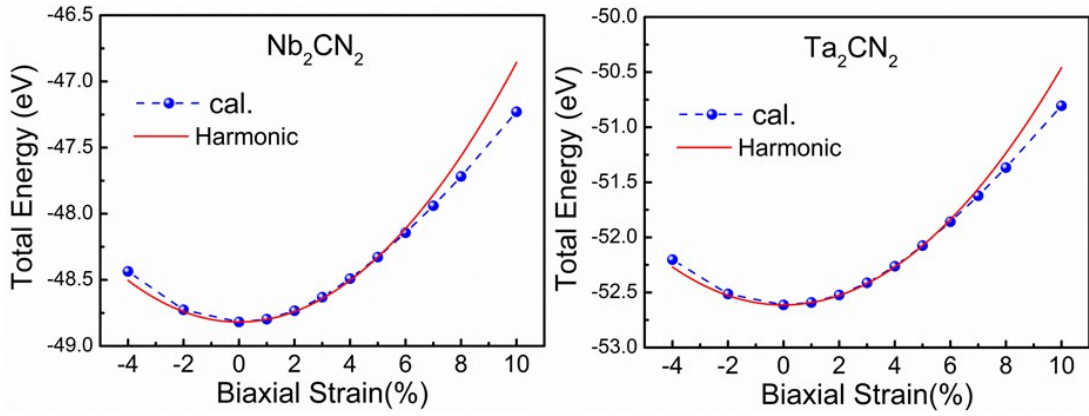

Fig. S1 Variation in the total energy of  $\text{M}_2\text{CN}_2$  ( $\text{M} = \text{Nb}$  and  $\text{Ta}$ ) under various biaxial strains shown by the dashed curve with large blue dots indicating the calculated data points. The harmonic part is fitted to a parabola presented by a red-solid curve.

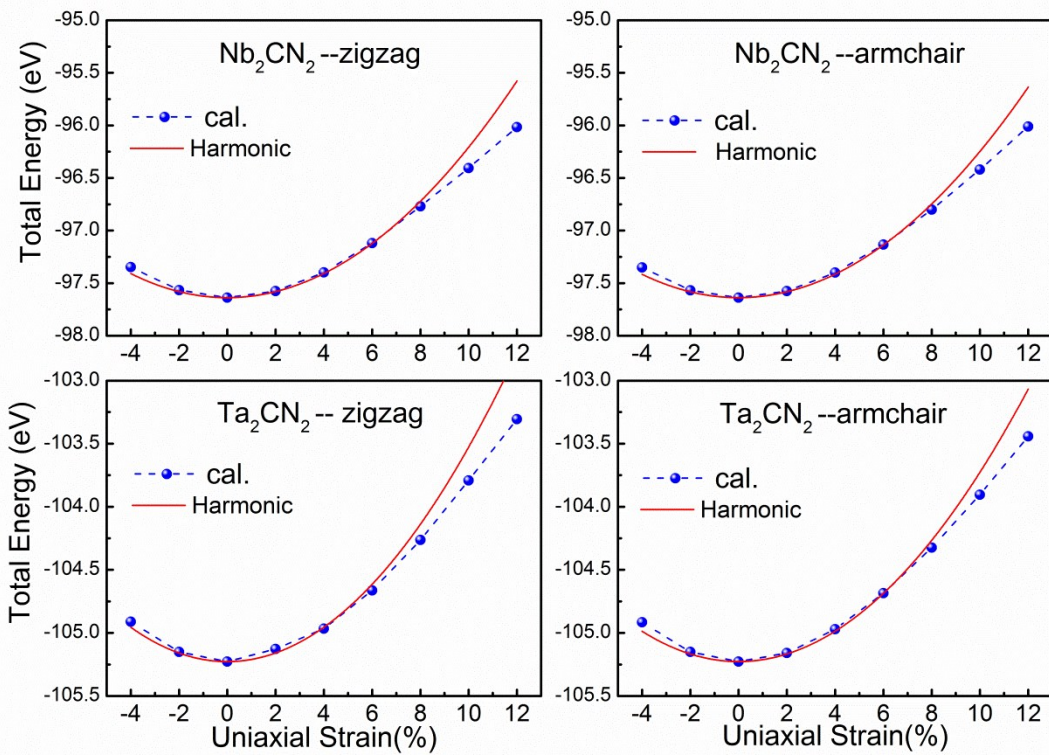

Fig. S2 Variation in the total energy of  $\text{M}_2\text{CN}_2$  ( $\text{M} = \text{Nb}$  and  $\text{Ta}$ ) under various zigzag and armchair shown by the dashed curve with large blue dots indicating the calculated data points. The harmonic part is fitted to a parabola presented by a red-solid curve.

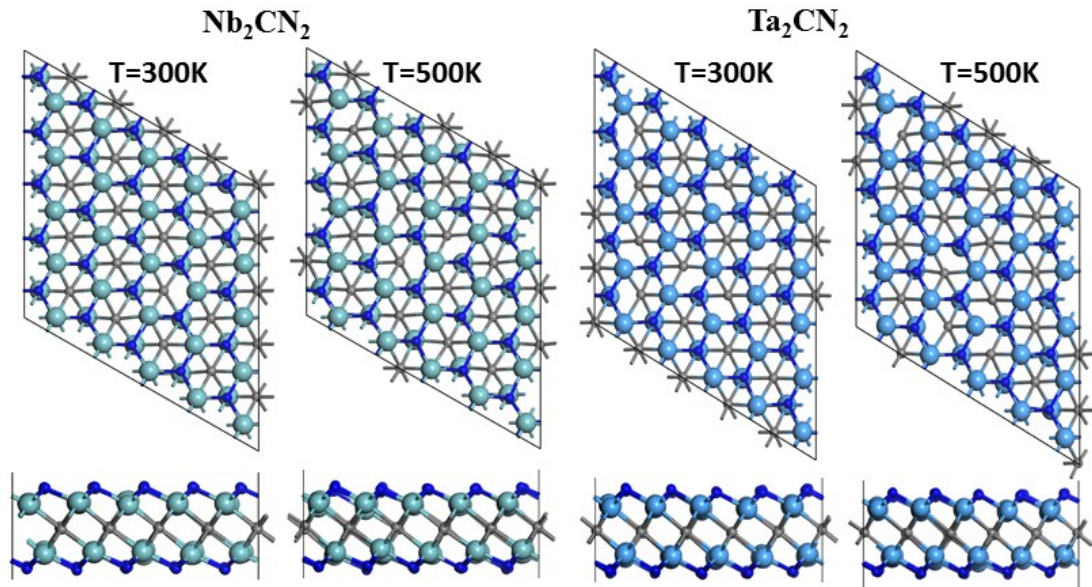

Fig. S3 Snapshots of atomic configurations of  $\text{M}_2\text{CN}_2$  ( $\text{M} = \text{Nb}$  and  $\text{Ta}$ ) at the end of AIMD simulations. The optimized atomic structures are displayed in the top and side views.

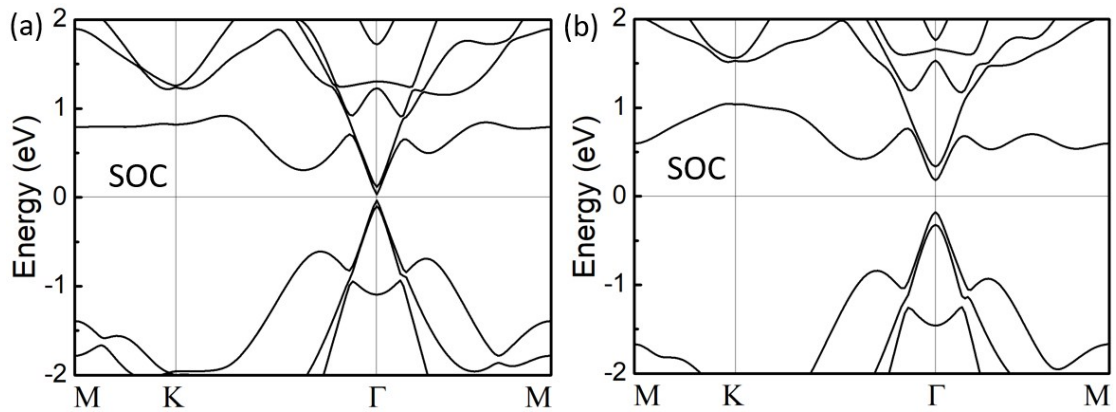

Fig. S4 Calculated PBE band structures of  $\text{Nb}_2\text{CN}_2$  (a) and  $\text{Ta}_2\text{CN}_2$  (b) with SOC.

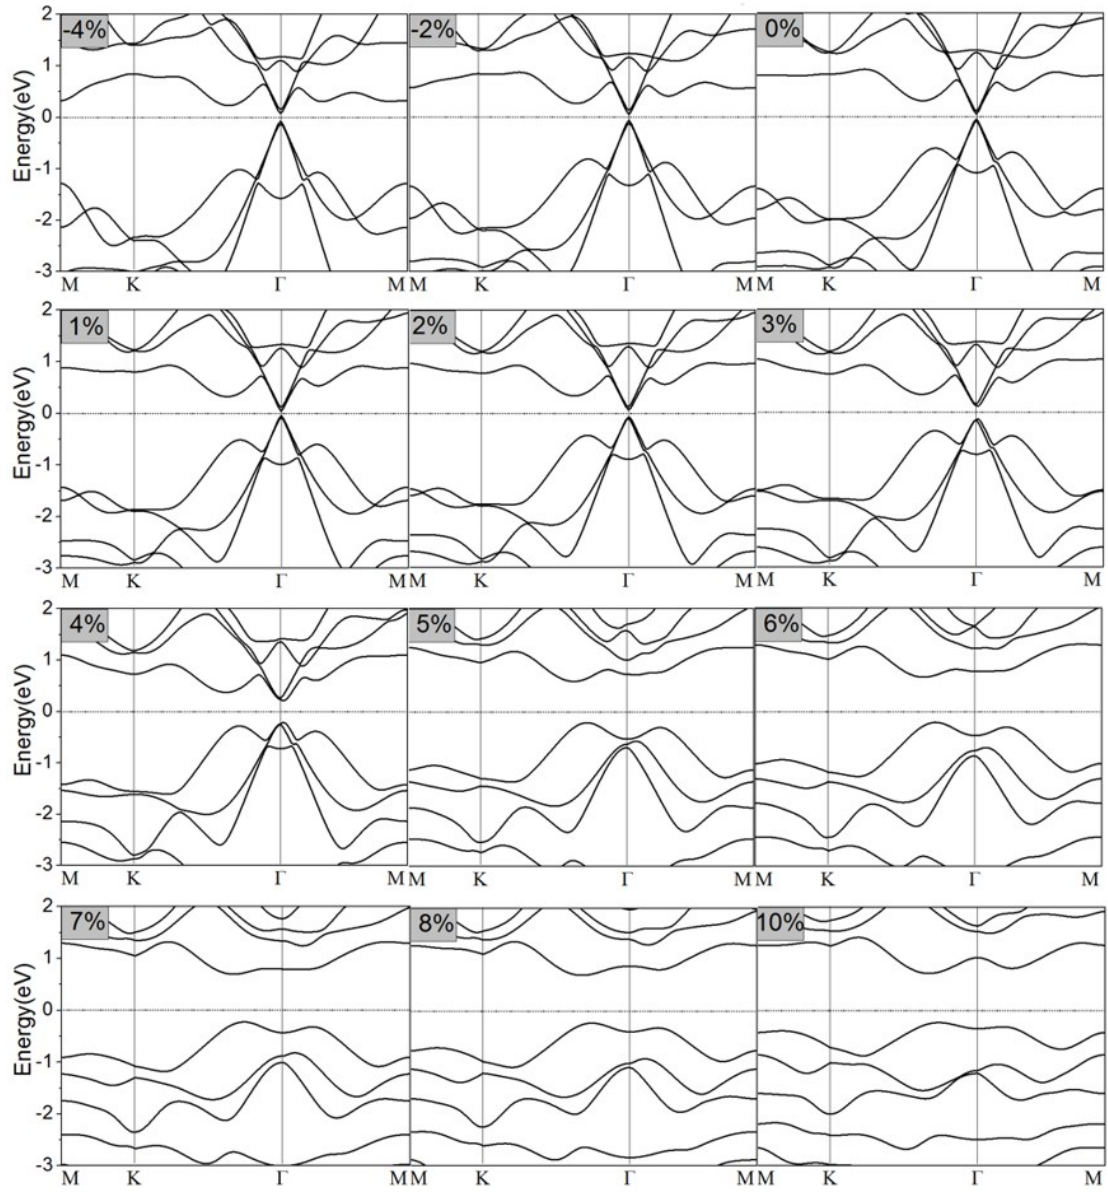

Fig. S5 The PBE band structures of Nb<sub>2</sub>CN<sub>2</sub> under various biaxial strains along the high symmetry lines M-K-Γ-M of the Brillouin zone.

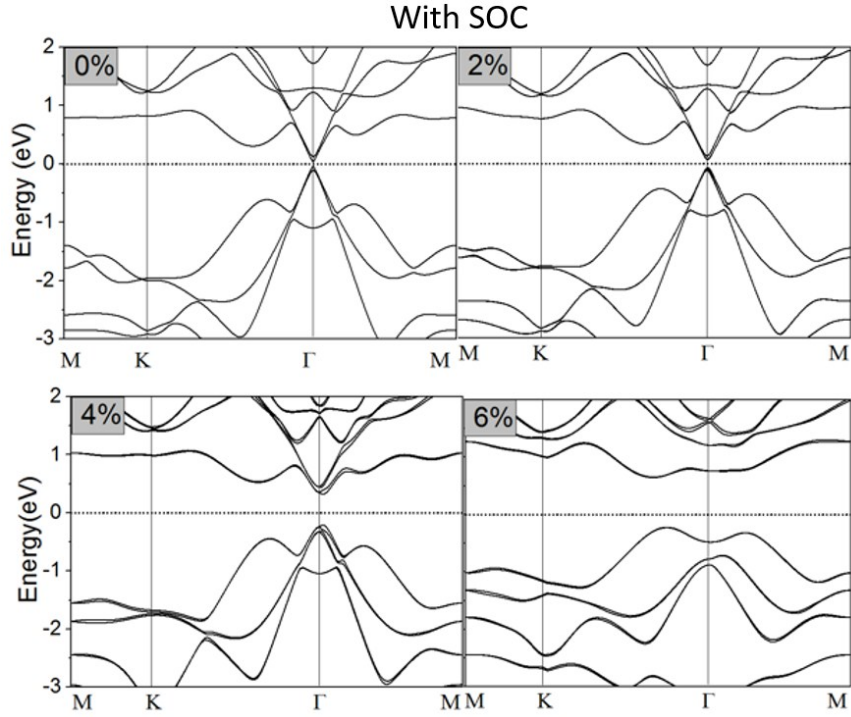

Fig. S6 The PBE band structures of Nb<sub>2</sub>CN<sub>2</sub> with SOC under various biaxial strains along the high symmetry lines M-K-Γ-M of the Brillouin zone.

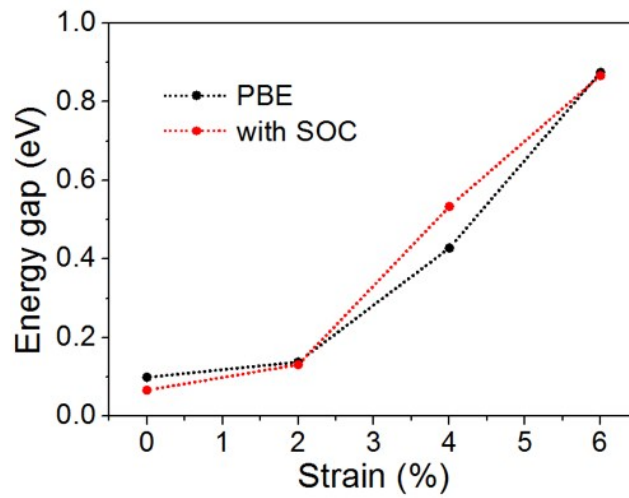

Fig. S7 The PBE band gap evolution of Nb<sub>2</sub>CN<sub>2</sub> as a function of strain.



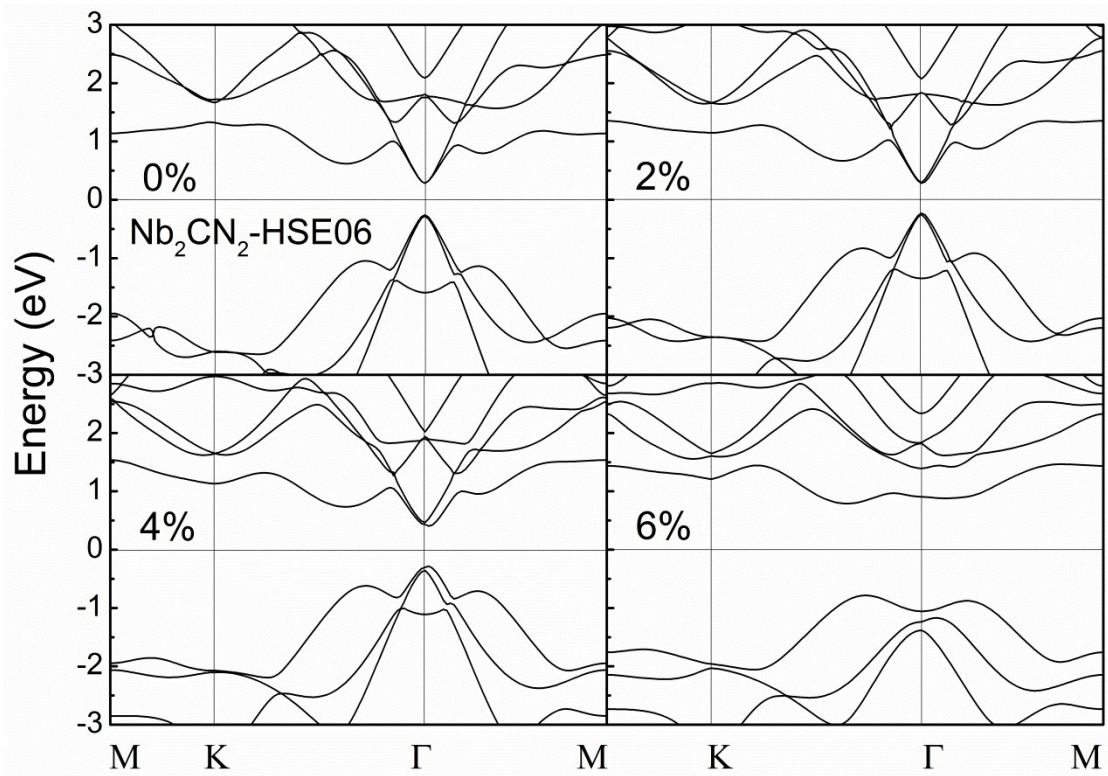

Fig. S8 Calculated HSE band structures of  $\text{Nb}_2\text{CN}_2$  under various biaxial strains.

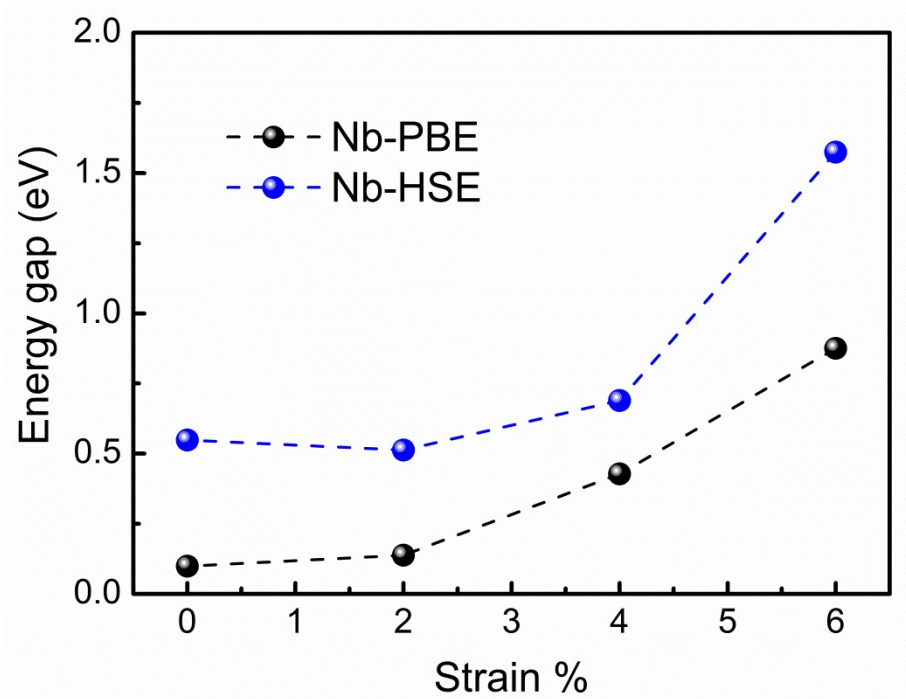

Fig. S9 The PBE/HSE band gap evolution of  $\text{Nb}_2\text{CN}_2$  as a function of strain.

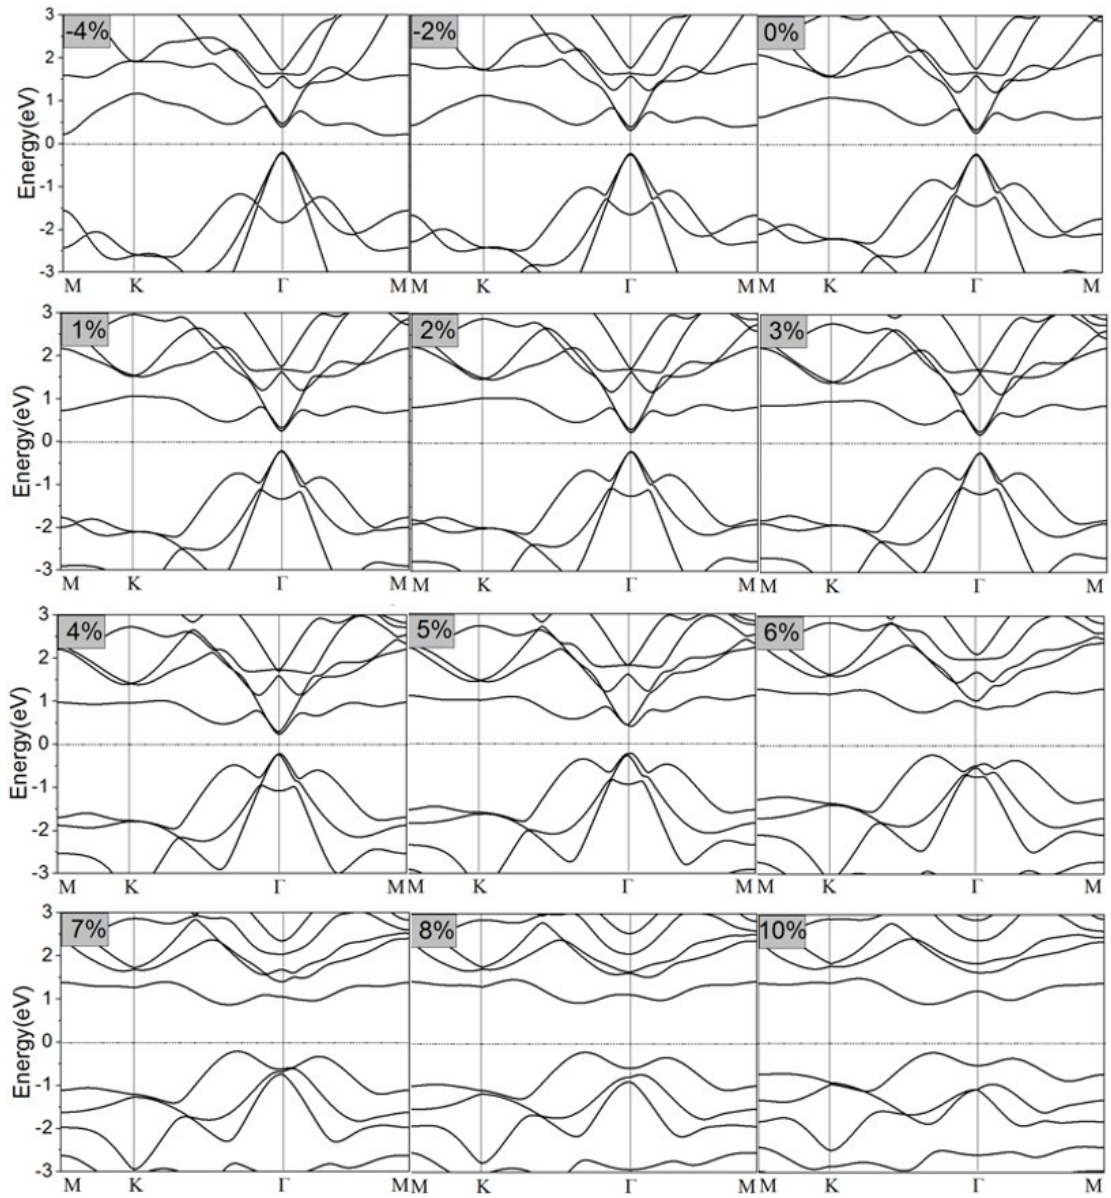

Fig. S10 The PBE band structures of Ta<sub>2</sub>CN<sub>2</sub> under various biaxial strains along the high symmetry lines M-K- $\Gamma$ -M of the Brillouin zone.



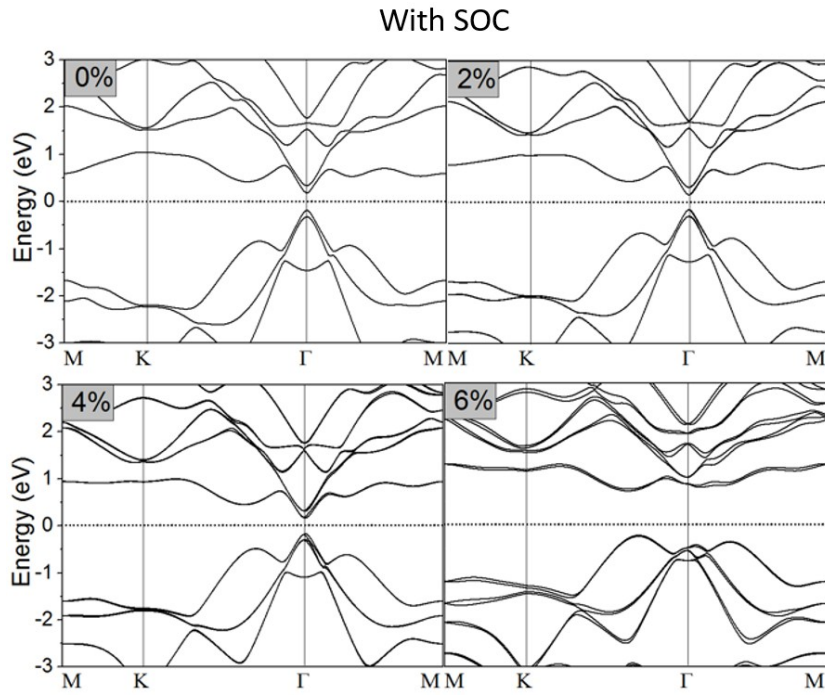

Fig. S11 The band structures of Ta<sub>2</sub>CN<sub>2</sub> with SOC under various biaxial strains along the high symmetry lines M-K-Γ-M of the Brillouin zone.

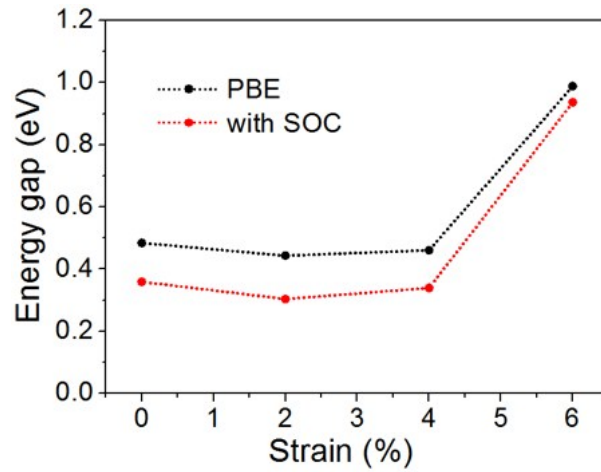

Fig. S12 The band gap evolution of Ta<sub>2</sub>CN<sub>2</sub> as a function of strain.

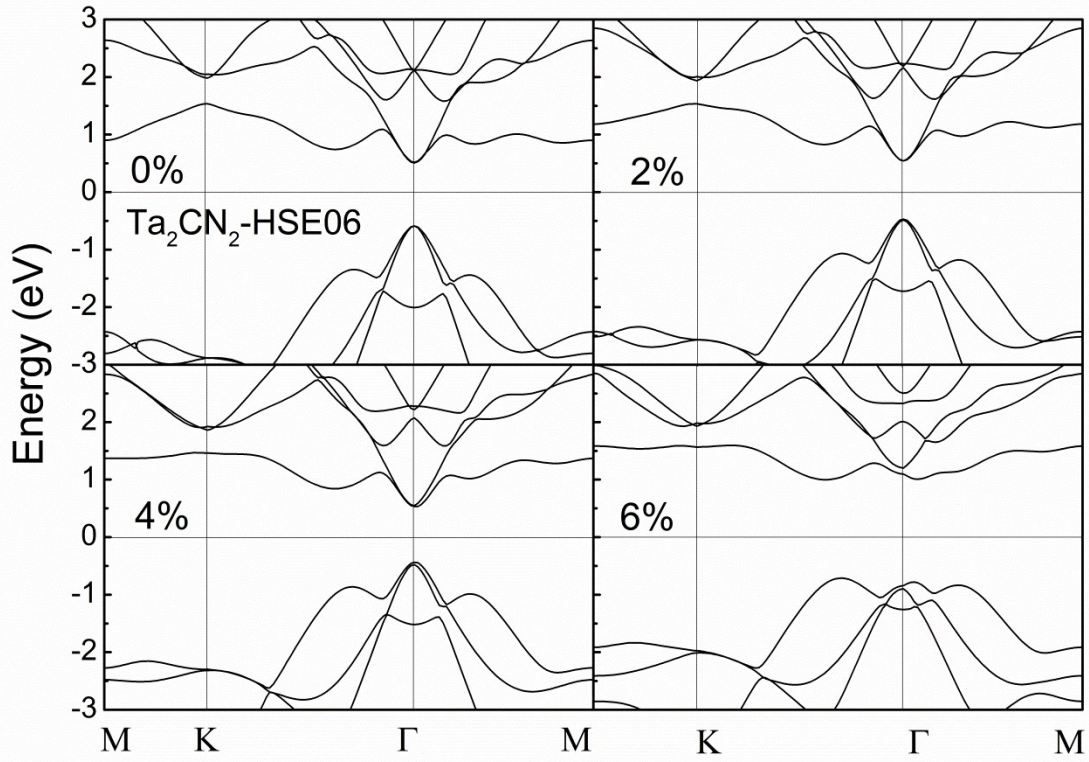

Fig. S13 Calculated HSE band structures of  $\text{Ta}_2\text{CN}_2$  under various biaxial strains.

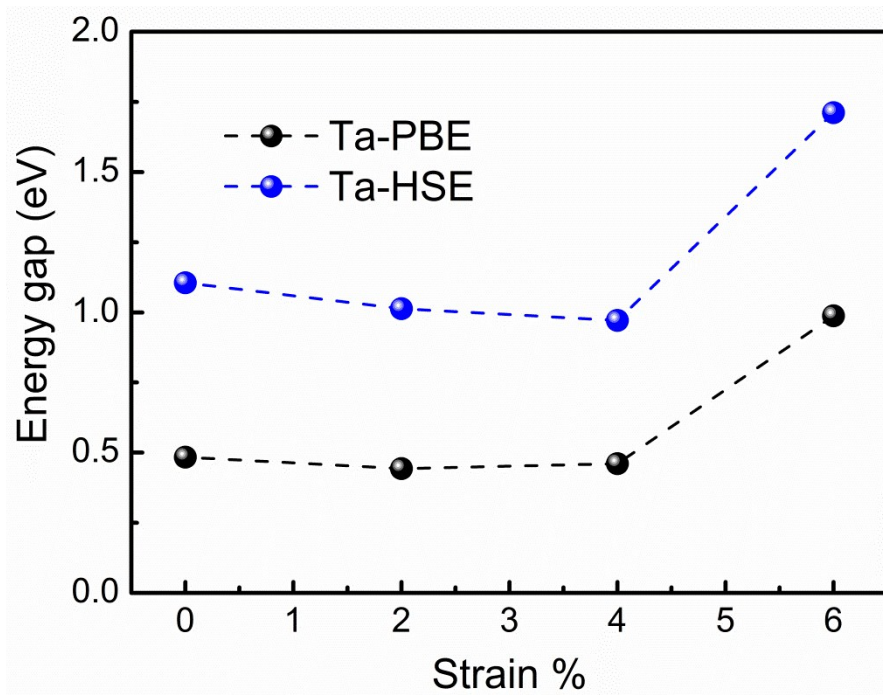

Fig. S14 The PBE/HSE band gap evolution of  $\text{Ta}_2\text{CN}_2$  as a function of strain.

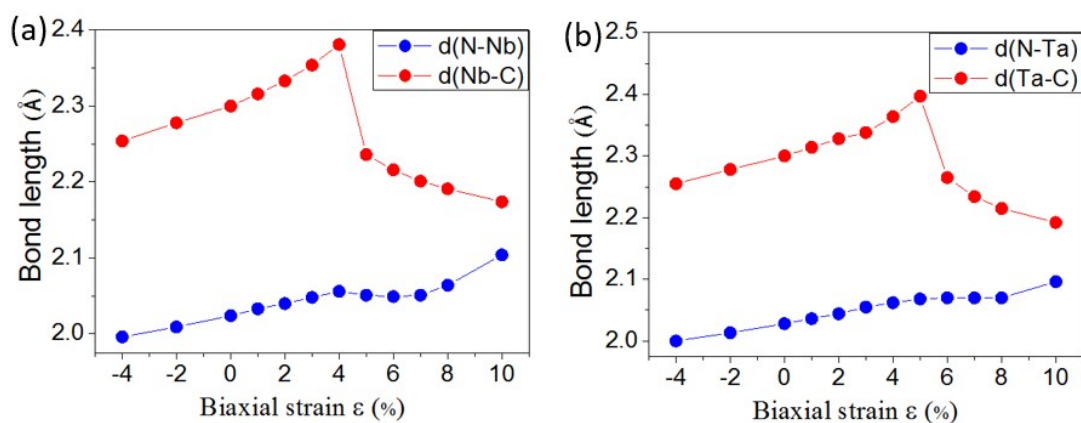

Fig. S15 The bond length evolution of  $\text{Nb}_2\text{CN}_2$  (a) and  $\text{Ta}_2\text{CN}_2$  (b) as a function of strain.

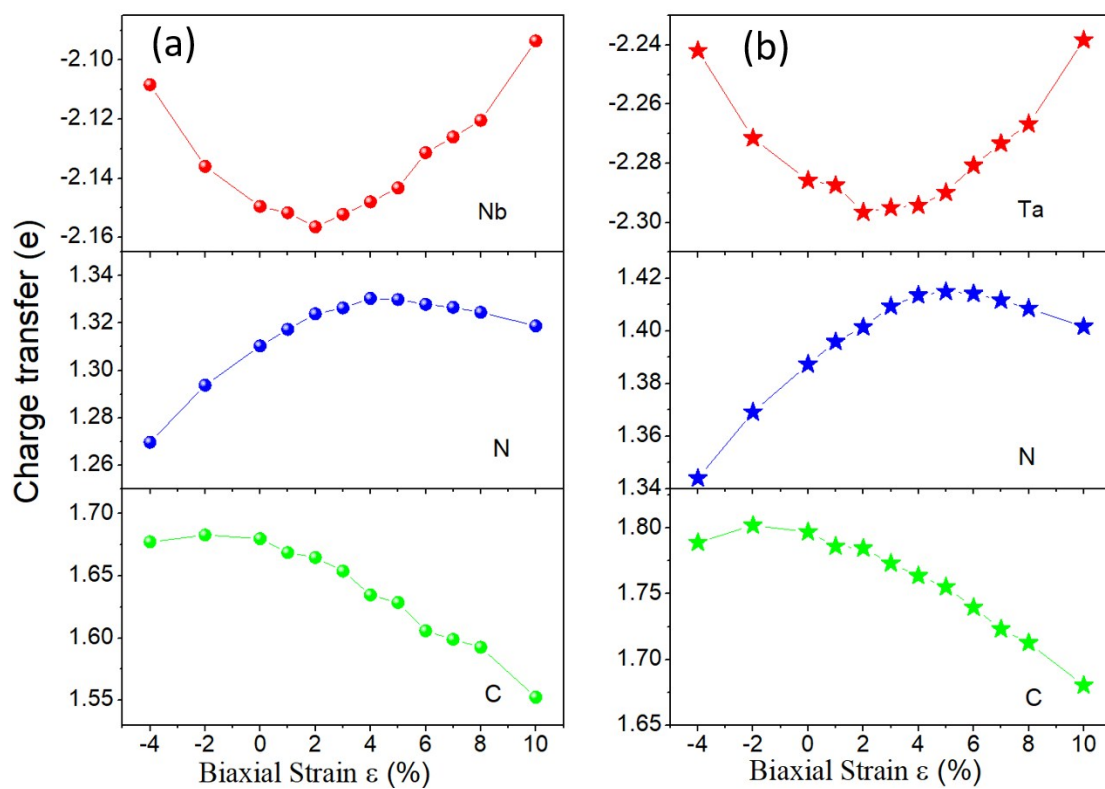

Fig. S16 The charge distribution of  $\text{Nb}_2\text{CN}_2$  and  $\text{Ta}_2\text{CN}_2$  as a function of strain.

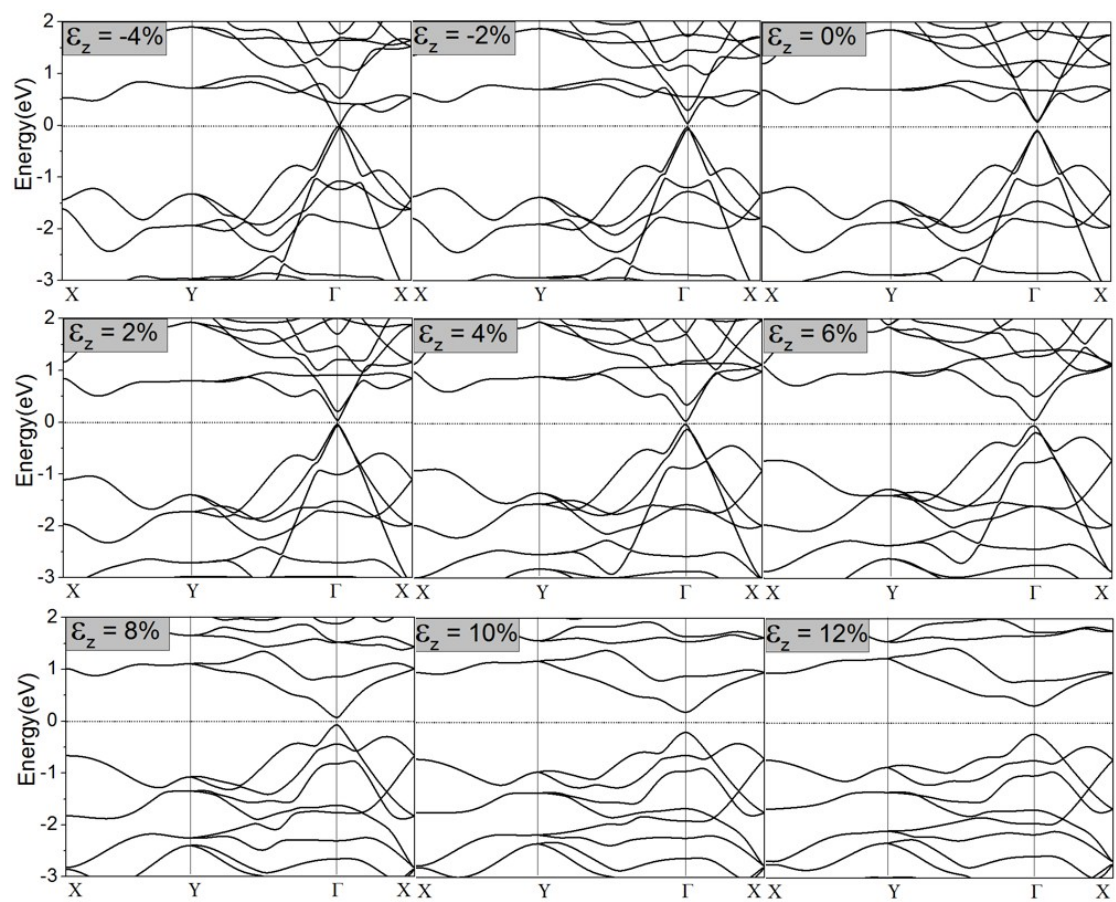

Fig. S17 The band structures of Nb<sub>2</sub>CN<sub>2</sub> under various uniaxial strains along zigzag direction.



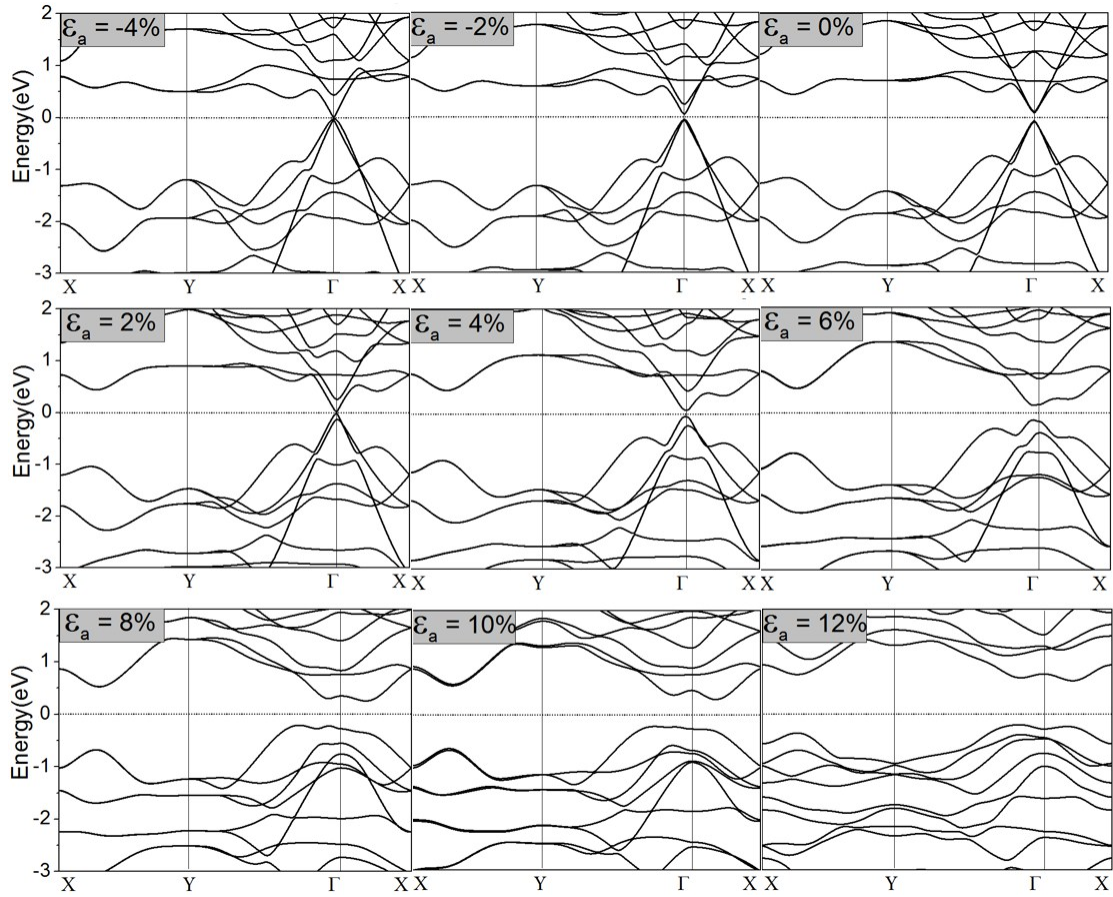

Fig. S18 The band structures of  $\text{Nb}_2\text{CN}_2$  under various uniaxial strains along armchair direction.

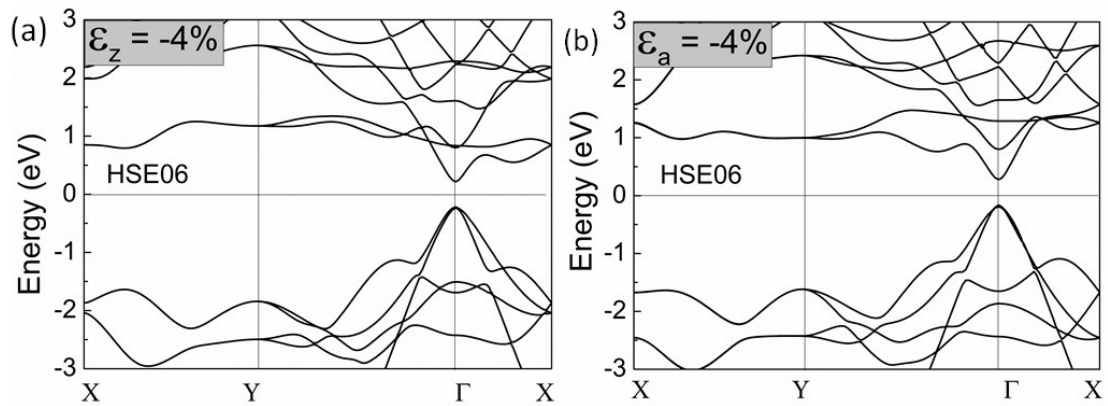

Fig. S19 Calculated HSE band structures at -4% uniaxial strain along zigzag (a) and armchair (b) directions, respectively.



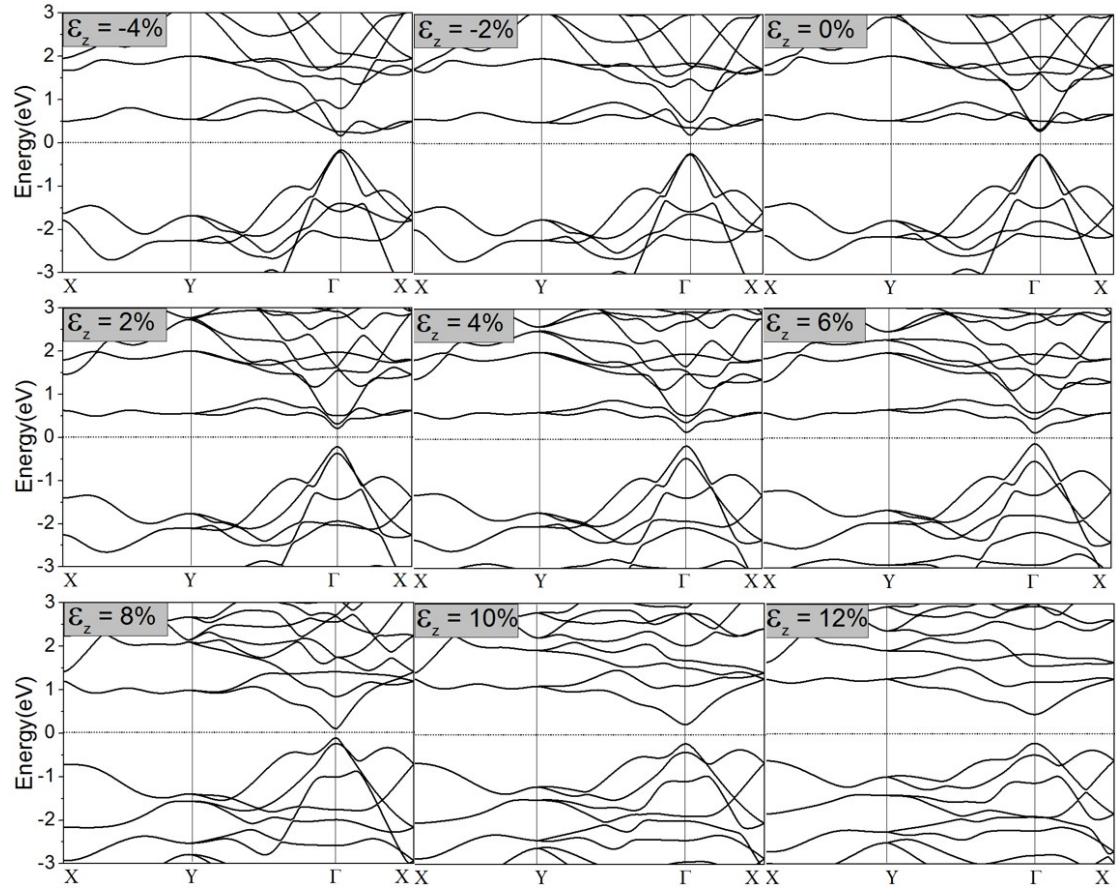

Fig. S20 The band structures of  $\text{Ta}_2\text{CN}_2$  under various uniaxial strains along zigzag direction.

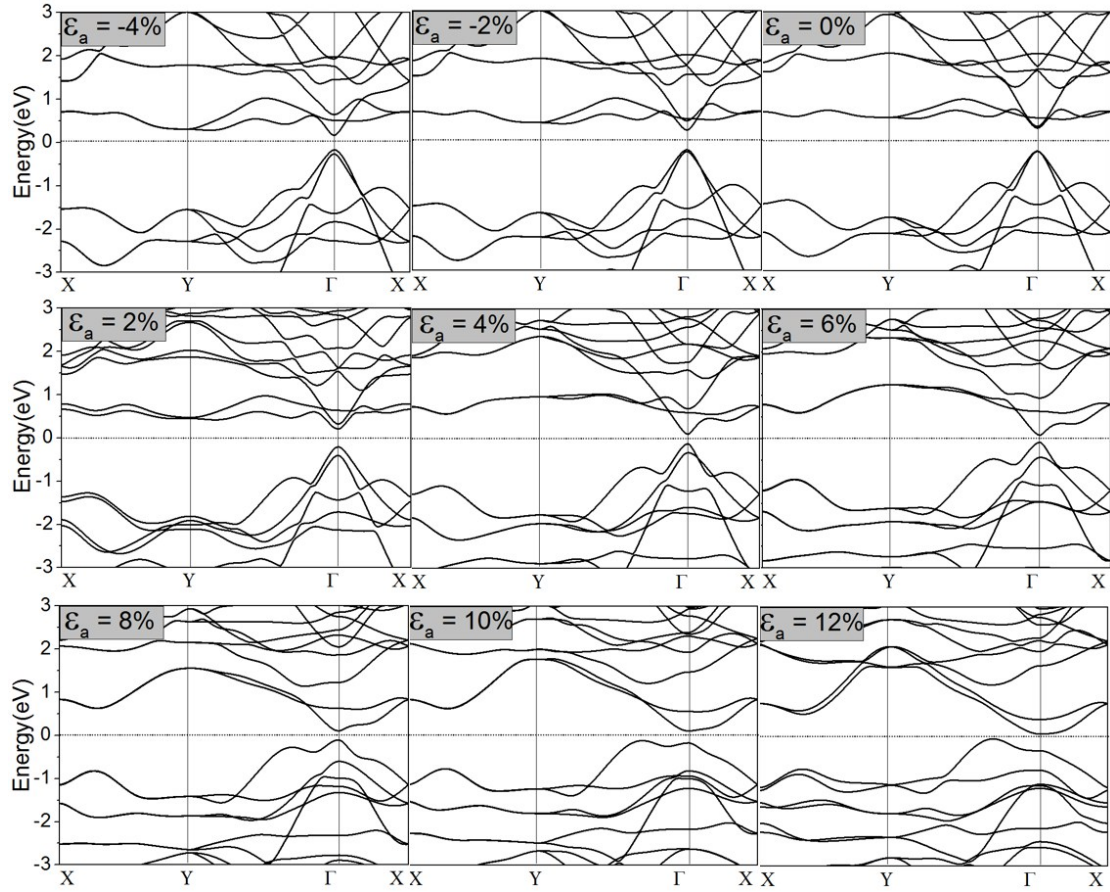

Fig. S21 The band structures of  $\text{Ta}_2\text{CN}_2$  under various uniaxial strains along armchair direction.

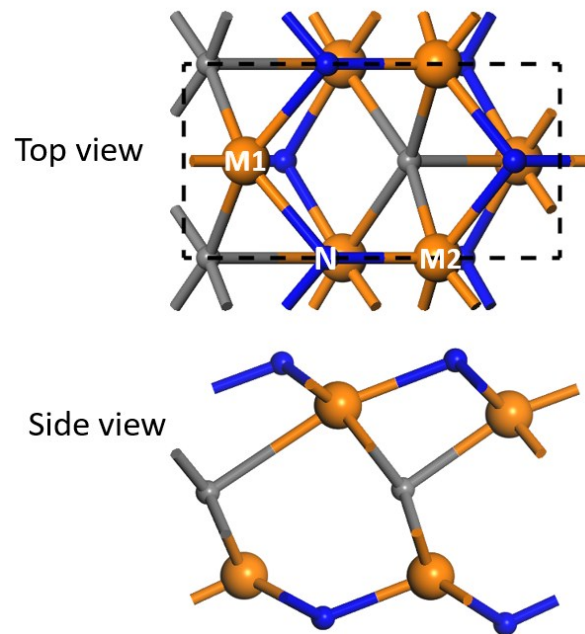

Fig. S22 Top view and side view of  $M_2CN_2$  ( $M = Nb, \&Ta$ ) under uniaxial strain.

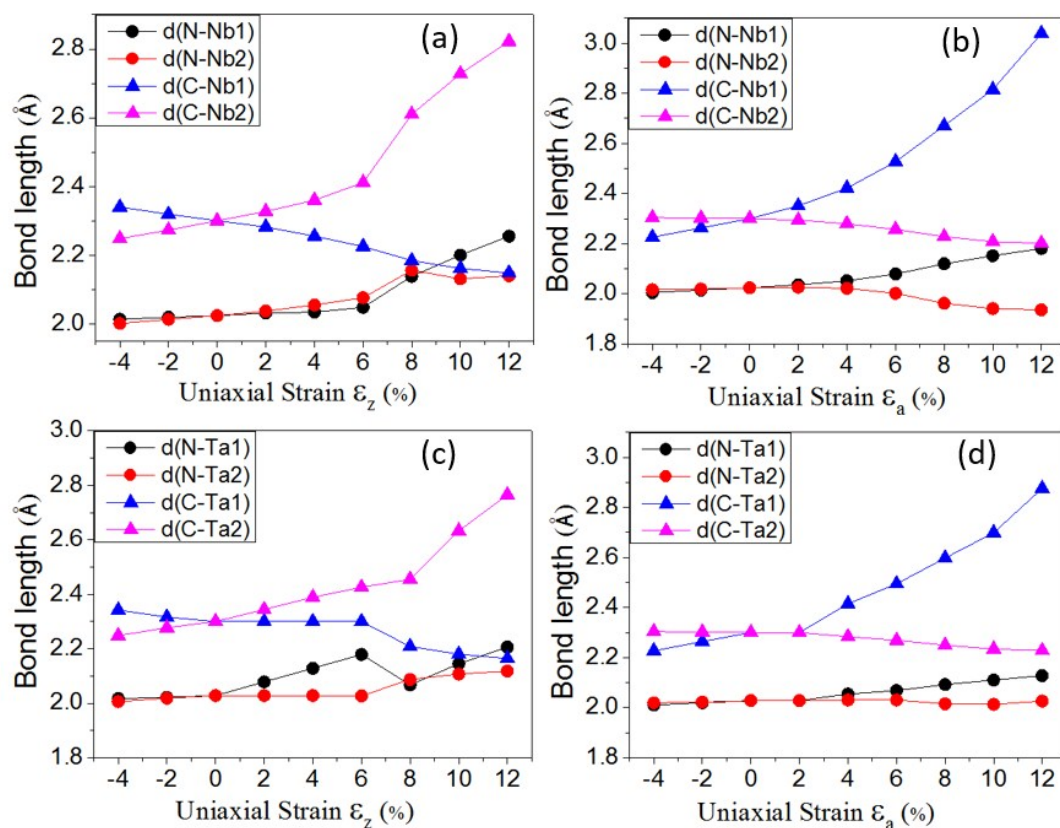

Fig. S23 The bond length evolution of  $Nb_2CN_2$  (a) and  $Ta_2CN_2$  (c) as a function of zigzag strain. The bond length evolution of  $Nb_2CN_2$  (b) and  $Ta_2CN_2$  (d) as a function of armchair strain.

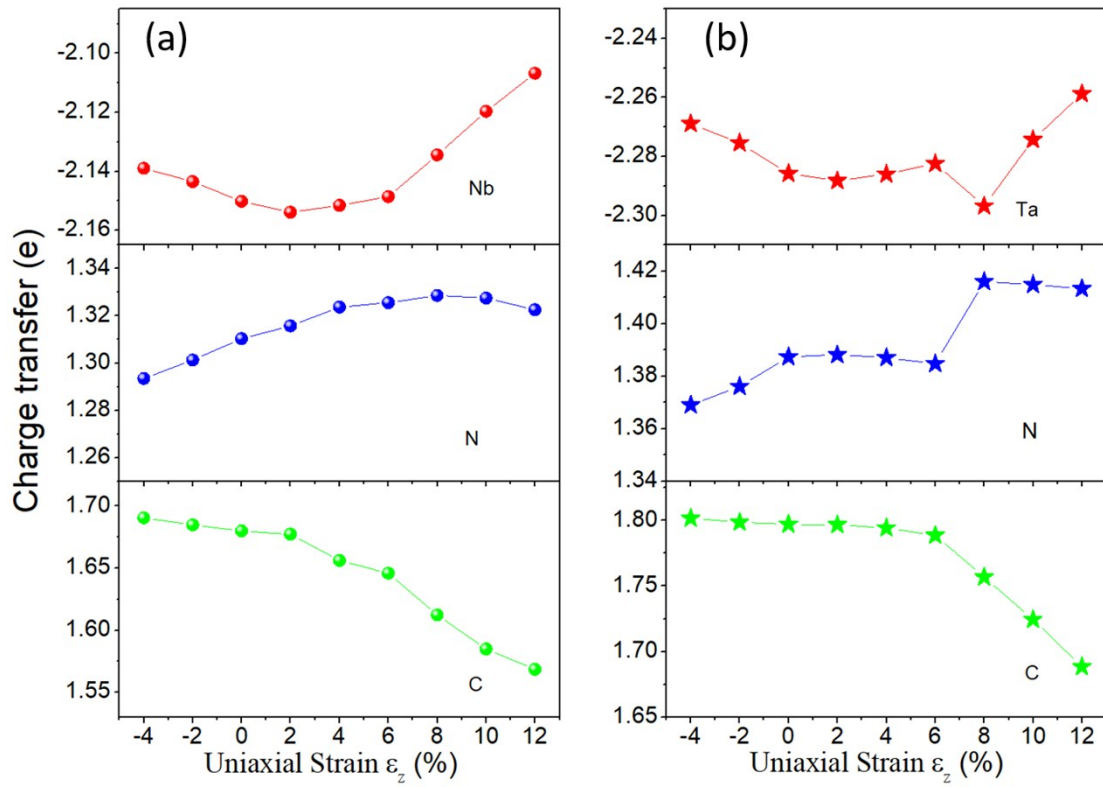

Fig. S24 The charge distribution of  $\text{Nb}_2\text{CN}_2$  and  $\text{Ta}_2\text{CN}_2$  as a function of zigzag strain.

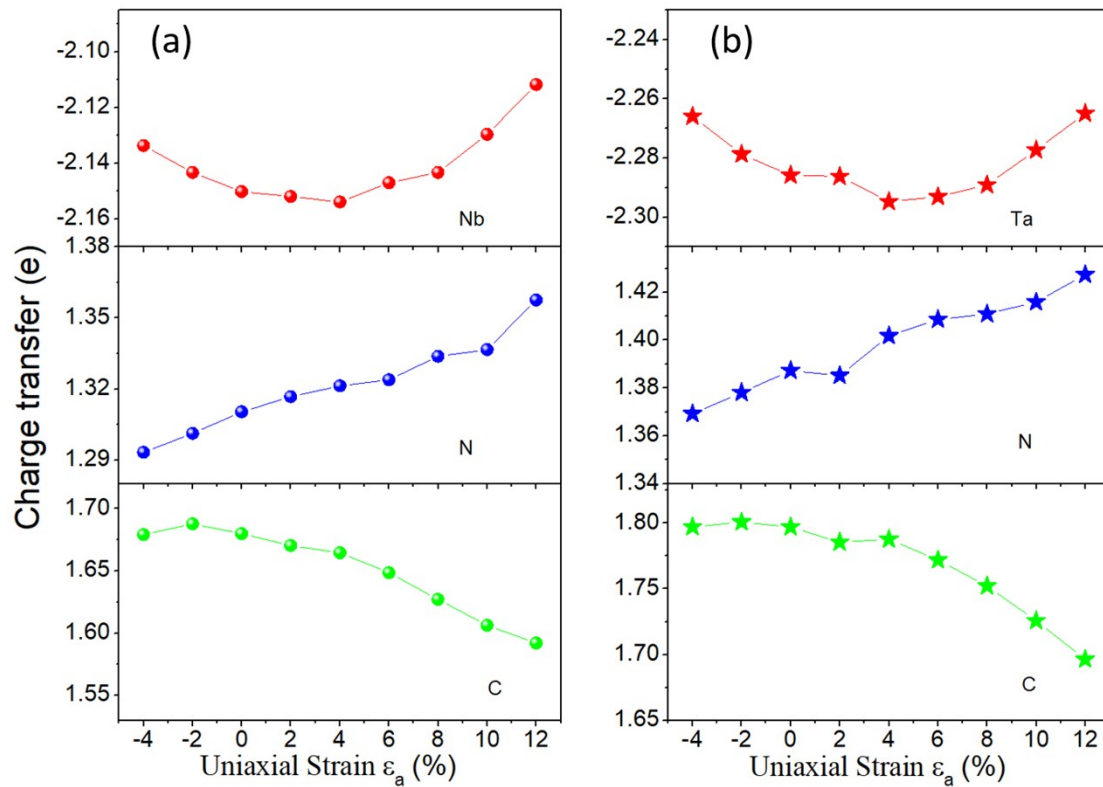

Fig. S25 The charge distribution of Nb<sub>2</sub>CN<sub>2</sub> and Ta<sub>2</sub>CN<sub>2</sub> as a function of armchair strain.

Structure data

Nb<sub>2</sub>CN<sub>2</sub>

```

1.0000000000000000
    3.1612999439000000    0.0000000000000000    0.0000000000000000
   -1.5806499720000000    2.7377660603999998    0.0000000000000000
    0.0000000000000000    0.0000000000000000    25.0000000000000000

N    C    Nb
  2    1    2
  
```

Direct

```

0.3333300050000005  0.6666700239999983  0.5735399719999990
0.6666700239999983  0.3333300050000005  0.3915599879999974
0.0000000000000000  0.0000000000000000  0.4825499949999994
0.3333300050000005  0.6666700239999983  0.4265800120000023
0.6666700239999983  0.3333300050000005  0.5385100250000008
  
```

Ta<sub>2</sub>CN<sub>2</sub>

```

1.0000000000000000
    3.1603999138000001    0.0000000000000000    0.0000000000000000
   -1.5801999569000000    2.7369866114999999    0.0000000000000000
    0.0000000000000000    0.0000000000000000    25.0000000000000000
  
```



N C Ta  
2 1 2

Direct

|                    |                    |                    |
|--------------------|--------------------|--------------------|
| 0.3333300050000005 | 0.6666700239999983 | 0.5585100050000023 |
| 0.6666700239999983 | 0.3333300050000005 | 0.3756699859999983 |
| 0.0000000000000000 | 0.0000000000000000 | 0.4670900110000034 |
| 0.3333300050000005 | 0.6666700239999983 | 0.4110800030000021 |
| 0.6666700239999983 | 0.3333300050000005 | 0.5231000189999975 |
